# Supplementary material for: A study of the correlation between obesity and intestinal flora in school-age children
Source: PubMed Central journal article supplement (PMC6162261; doi:10.1038/s41598-018-32730-6), 2018-09-28
Supplement: 41598_2018_32730_MOESM1_ESM.pdf [file 41598_2018_32730_MOESM1_ESM.pdf]

## **A study of the correlation between obesity and intestinal flora in school-age children**

Xiaolin Gao<sup>1,5</sup>, MD, Ruizhen Jia<sup>2</sup>, MM, Liang Xie<sup>3</sup>, PhD, Linghan Kuang<sup>4</sup>, MM, Ling Feng<sup>1</sup>, MM, Chaomin Wan<sup>1</sup>, MD, PhD

### **Affiliations:**

<sup>1</sup> Department of Paediatrics, West China University Second Hospital, Sichuan University (Chengdu, Sichuan, China, 610041).

<sup>2</sup> Open Laboratory, West China Institute for Women's and Children's Health (Chengdu, Sichuan, China, 610041).

<sup>3</sup> Pulmonary Vascular Remodelling Research Unit Laboratory, West China Institute for Women's and Children's Health (Chengdu, Sichuan, China, 610041).

<sup>4</sup> Department of Laboratory Medicine, Sichuan University West China Second Hospital (Chengdu, Sichuan, China, 610041).

<sup>5</sup> Key Laboratory of Birth Defects and Related Diseases of Women and Children (Sichuan University), Ministry of Education

### **Corresponding author:**

Chaomin Wan<sup>1</sup> MD, PhD

Professor, Department of Paediatrics

Western Women's and Children's Research Institute

Number 20, 3rd Section, People's South Road

Chengdu, Sichuan Province, China, 610041

Email: [wanchaomin@scu.edu.cn](mailto:wanchaomin@scu.edu.cn)

TEL: +86 2885503185

Fax: +86 2885503799.

### **Authors' Email:**

**Xiaolin Gao:** [23132875@qq.com](mailto:23132875@qq.com)

**Ruizhen Jia:** [1002113878@qq.com](mailto:1002113878@qq.com)

**Liang Xie:** [1154792673@qq.com](mailto:1154792673@qq.com)

**Linghan Kuang:** [hanhan840106@163.com](mailto:hanhan840106@163.com)

**Ling Feng:** [348030966@qq.com](mailto:348030966@qq.com)

**Chaomin Wan:** [wanchaomin@scu.edu.cn](mailto:wanchaomin@scu.edu.cn)

## Supplementary information

**Supplementary Figure 1.** Representative graph shows the rarefaction of sample (Shannon). The similar rarefaction measures for other indexes (observed species index, ACE index, and Simpson index) were performed in the same manner.

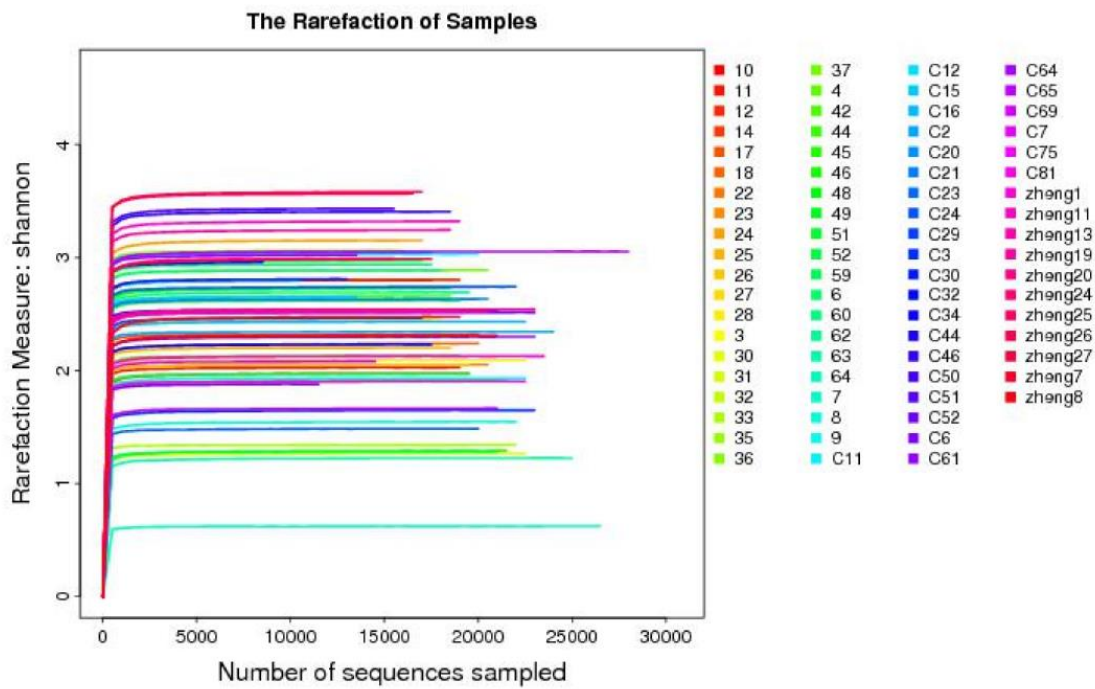

**Supplementary Table 1.** Comparisons of relative abundance of gut bacteria at the level of species in obesity and control groups. Data are present as median (quartile Q1, Q3) and interquartile range (IQR)

| Species                     | Obesity                           | Obesity IQR | Control                        | Control IQR | P-value | FDR   |
|-----------------------------|-----------------------------------|-------------|--------------------------------|-------------|---------|-------|
| Coprobacillus_cateniformis  | 0 (0,0)                           | 0.000       | 0 (0,0.00407275)               | 0.004       | 0.011   | 0.077 |
| Staphylococcus_capitis      | 0 (0,0)                           | 0.000       | 0 (0,0)                        | 0.000       | 0.012   | 0.085 |
| Blautia_hanseni             | 0 (0,0)                           | 0.000       | 0 (0,0)                        | 0.000       | 0.013   | 0.088 |
| Parvimonas_micra            | 0 (0,0)                           | 0.000       | 0 (0,0.00272625)               | 0.003       | 0.013   | 0.088 |
| Bifidobacterium_breve       | 0 (0,0)                           | 0.000       | 0 (0,0.00867875)               | 0.009       | 0.014   | 0.092 |
| Terrisporobacter_glycolicus | 0 (0,0)                           | 0.000       | 0 (0,0.004059)                 | 0.004       | 0.015   | 0.096 |
| Dialister_sucinatiphilus    | 0 (0,0)                           | 0.000       | 0 (0,0)                        | 0.000       | 0.016   | 0.097 |
| Anaerotruncus_colihominis   | 0 (0,0)                           | 0.000       | 0 (0,0.0114675)                | 0.011       | 0.018   | 0.104 |
| Lactobacillus_rogosae       | 0.0533995 (0.0059865, 0.26305025) | 0.257       | 0.0122135 (0,0.0575285)        | 0.058       | 0.018   | 0.106 |
| Oribacterium_sinus          | 0 (0,0)                           | 0.000       | 0 (0,0)                        | 0.000       | 0.023   | 0.129 |
| Clostridium_colinum         | 0 (0,0)                           | 0.000       | 0 (0,0)                        | 0.000       | 0.024   | 0.130 |
| Bacteroides_dorei           | 7.3311575 (1.6936, 23.91409225)   | 22.220      | 2.039316 (0.529311, 8.78872)   | 8.259       | 0.026   | 0.132 |
| Eubacterium_siraeum         | 0 (0,0)                           | 0.000       | 0 (0,0.01680775)               | 0.017       | 0.025   | 0.132 |
| Ruminococcus_lactaris       | 0 (0,0)                           | 0.000       | 0 (0,0.004556)                 | 0.005       | 0.025   | 0.132 |
| Dialister_invisus           | 0 (0,0.01811875)                  | 0.018       | 0.026985 (0,0.509202)          | 0.509       | 0.027   | 0.132 |
| Streptococcus_mutans        | 0 (0,0)                           | 0.000       | 0 (0,0)                        | 0.000       | 0.027   | 0.132 |
| Ruminococcus_torques        | 0.19293 (0.0515635, 0.4552475)    | 0.404       | 0.291623 (0.1101765, 0.986532) | 0.876       | 0.034   | 0.164 |
| Clostridium_spiroforme      | 0 (0,0)                           | 0.000       | 0 (0,0)                        | 0.000       | 0.035   | 0.166 |
| Brevundimonas-vesicularis   | 0 (0,0)                           | 0.000       | 0 (0,0)                        | 0.000       | 0.043   | 0.177 |

|                               |                                      |       |                                     |       |       |       |
|-------------------------------|--------------------------------------|-------|-------------------------------------|-------|-------|-------|
| Lactobacillus_gasseri         | 0 (0,0)                              | 0.000 | 0 (0,0)                             | 0.000 | 0.043 | 0.177 |
| Mitsuokella_multacida         | 0 (0,0)                              | 0.000 | 0 (0,0)                             | 0.000 | 0.043 | 0.177 |
| Parabacteroides_johnsonii     | 0 (0,0)                              | 0.000 | 0 (0,0)                             | 0.000 | 0.042 | 0.177 |
| Phascolarctobacterium_faecium | 0.6267315<br>(0.05078375,1.92924375) | 1.878 | 0.0996425<br>(0.00484175,0.7122665) | 0.707 | 0.040 | 0.177 |
| Roseburia_hominis             | 0 (0,0)                              | 0.000 | 0 (0,0)                             | 0.000 | 0.041 | 0.177 |
| Rothia_mucilaginosa           | 0 (0,0)                              | 0.000 | 0 (0,0)                             | 0.000 | 0.039 | 0.177 |
| Bifidobacterium_bifidum       | 0 (0,0)                              | 0.000 | 0 (0,0)                             | 0.000 | 0.047 | 0.188 |
| Bacteroides_caccae            | 0.0264705<br>(0.00104,0.1956335)     | 0.195 | 0.121857<br>(0.00749175,0.56704825) | 0.560 | 0.049 | 0.192 |
| Blautia_faecis                | 0.0233625<br>(0.0043085,0.04447975)  | 0.040 | 0.0404905<br>(0.00783675,0.0910785) | 0.083 | 0.053 | 0.204 |
| Atopobium_parvulum            | 0 (0,0)                              | 0.000 | 0 (0,0)                             | 0.000 | 0.056 | 0.215 |
| Megasphaera_micronuciformis   | 0 (0,0)                              | 0.000 | 0 (0,0)                             | 0.000 | 0.066 | 0.246 |
| Acinetobacter_johnsonii       | 0 (0,0)                              | 0.000 | 0 (0,0)                             | 0.000 | 0.073 | 0.253 |
| Acinetobacter_venetianus      | 0 (0,0)                              | 0.000 | 0 (0,0)                             | 0.000 | 0.082 | 0.253 |
| Alcaligenes_faecalis          | 0 (0,0)                              | 0.000 | 0 (0,0)                             | 0.000 | 0.082 | 0.253 |
| Alistipes_finegoldii          | 0 (0,0)                              | 0.000 | 0 (0,0)                             | 0.000 | 0.082 | 0.253 |
| Caulobacter_segnis            | 0 (0,0)                              | 0.000 | 0 (0,0)                             | 0.000 | 0.082 | 0.253 |
| Clostridium_saccharogumia     | 0 (0,0)                              | 0.000 | 0 (0,0)                             | 0.000 | 0.082 | 0.253 |
| Corynebacterium_argentotense  | 0 (0,0)                              | 0.000 | 0 (0,0)                             | 0.000 | 0.082 | 0.253 |
| Eubacterium_brachy            | 0 (0,0)                              | 0.000 | 0 (0,0)                             | 0.000 | 0.082 | 0.253 |
| Hungatella_halthewayi         | 0<br>(0,0.00750875)                  | 0.008 | 0.001356<br>(0,0.01611975)          | 0.016 | 0.080 | 0.253 |
| Lactococcus_l                 | 0 (0,0)                              | 0.000 | 0 (0,0)                             | 0.000 | 0.082 | 0.253 |

actis

|                                 |                                        |       |                                       |       |       |       |
|---------------------------------|----------------------------------------|-------|---------------------------------------|-------|-------|-------|
| Lactococcus_r<br>affinolactis   | 0 (0,0)                                | 0.000 | 0 (0,0)                               | 0.000 | 0.082 | 0.253 |
| Mogibacteriu<br>m_neglectum     | 0 (0,0)                                | 0.000 | 0<br>(0,0.00341725)                   | 0.003 | 0.073 | 0.253 |
| Rhizobium_tr<br>opici           | 0 (0,0)                                | 0.000 | 0 (0,0)                               | 0.000 | 0.082 | 0.253 |
| Sutterella_par<br>virubra       | 0 (0,0)                                | 0.000 | 0 (0,0)                               | 0.000 | 0.086 | 0.263 |
| Bacteroides_n<br>ordii          | 0<br>(0,0.021244<br>75)                | 0.021 | 0.006342<br>(0,0.0572795)             | 0.057 | 0.094 | 0.275 |
| Bifidobacteriu<br>m_animalis    | 0 (0,0)                                | 0.000 | 0 (0,0)                               | 0.000 | 0.093 | 0.275 |
| Fusobacteriu<br>m_nucleatum     | 0 (0,0)                                | 0.000 | 0 (0,0)                               | 0.000 | 0.093 | 0.275 |
| Actinomyces_<br>odontolyticus   | 0 (0,0)                                | 0.000 | 0 (0,0.005011)                        | 0.005 | 0.098 | 0.279 |
| Clostridium_p<br>erfringens     | 0<br>(0,0.008814<br>75)                | 0.009 | 0 (0,0)                               | 0.000 | 0.099 | 0.279 |
| Parabacteroid<br>es_goldsteinii | 0 (0,0)                                | 0.000 | 0 (0,0)                               | 0.000 | 0.100 | 0.279 |
| Veillonella_at<br>ypica         | 0 (0,0)                                | 0.000 | 0 (0,0)                               | 0.000 | 0.101 | 0.279 |
| Veillonella_dis<br>par          | 0.071067<br>(0.0172175,<br>0.23985775) | 0.223 | 0.029957<br>(0.00804125,0.<br>121743) | 0.114 | 0.107 | 0.293 |
| Acinetobacter<br>_lwoffii       | 0 (0,0)                                | 0.000 | 0 (0,0)                               | 0.000 | 0.160 | 0.332 |
| Alistipes_putr<br>edinis        | 0 (0,0)                                | 0.000 | 0 (0,0)                               | 0.000 | 0.160 | 0.332 |
| Bacteroides_fl<br>uxus          | 0 (0,0)                                | 0.000 | 0 (0,0)                               | 0.000 | 0.162 | 0.332 |
| Butyricimonas<br>_synergistica  | 0 (0,0)                                | 0.000 | 0 (0,0)                               | 0.000 | 0.160 | 0.332 |
| Centipeda_pe<br>riodontii       | 0 (0,0)                                | 0.000 | 0 (0,0)                               | 0.000 | 0.160 | 0.332 |
| Clostridium_al<br>denense       | 0 (0,0)                                | 0.000 | 0 (0,0)                               | 0.000 | 0.160 | 0.332 |
| Clostridium_p<br>araputrificum  | 0 (0,0)                                | 0.000 | 0 (0,0)                               | 0.000 | 0.148 | 0.332 |
| Collinsella_aer<br>ofaciens     | 0.009539<br>(0,0.044829<br>)           | 0.045 | 0.0043425<br>(0,0.0198135)            | 0.020 | 0.145 | 0.332 |
| Collinsella_int<br>estinalis    | 0 (0,0)                                | 0.000 | 0 (0,0)                               | 0.000 | 0.140 | 0.332 |

|                              |                                       |       |                                        |       |       |       |
|------------------------------|---------------------------------------|-------|----------------------------------------|-------|-------|-------|
| Coprococcus_eutactus         | 0 (0,0)                               | 0.000 | 0 (0,0.02271325)                       | 0.023 | 0.146 | 0.332 |
| Delftia_tsuruh<br>atensis    | 0 (0,0)<br>0.067087                   | 0.000 | 0 (0,0)                                | 0.000 | 0.160 | 0.332 |
| Dorea_longica<br>tena        | (0.02327275<br>,0.13833725<br>)       | 0.115 | 0.0441475<br>(0.0009465,0.1<br>58742)  | 0.158 | 0.159 | 0.332 |
| Enhydrobacter_aerosaccus     | 0 (0,0)                               | 0.000 | 0 (0,0)                                | 0.000 | 0.160 | 0.332 |
| Flavobacterium_suncheonense  | 0 (0,0)                               | 0.000 | 0 (0,0)                                | 0.000 | 0.160 | 0.332 |
| Fluviicola_taffensis         | 0 (0,0)                               | 0.000 | 0 (0,0)                                | 0.000 | 0.160 | 0.332 |
| Gemmiger_fornicilis          | 0.3307995<br>(0.0599675,<br>0.665856) | 0.606 | 0.874484<br>(0.0096125,2.3<br>7034125) | 2.361 | 0.151 | 0.332 |
| Granulicatella_adiacens      | 0<br>(0,0.004214<br>)                 | 0.004 | 0<br>(0,0.0051985)                     | 0.005 | 0.151 | 0.332 |
| Holdemania_filiformis        | 0 (0,0)                               | 0.000 | 0<br>(0,0.0073315)                     | 0.007 | 0.144 | 0.332 |
| Lachnoanaerobaculum_umeaense | 0 (0,0)                               | 0.000 | 0 (0,0)                                | 0.000 | 0.160 | 0.332 |
| Lactobacillus_mucosae        | 0 (0,0)                               | 0.000 | 0 (0,0)                                | 0.000 | 0.160 | 0.332 |
| Leuconostoc_lactis           | 0 (0,0)                               | 0.000 | 0 (0,0)                                | 0.000 | 0.161 | 0.332 |
| Megasphaera_paucivorans      | 0 (0,0)                               | 0.000 | 0 (0,0)                                | 0.000 | 0.160 | 0.332 |
| Methylobacterium_jeotgali    | 0 (0,0)                               | 0.000 | 0 (0,0)                                | 0.000 | 0.160 | 0.332 |
| Paracoccus_cani              | 0 (0,0)                               | 0.000 | 0 (0,0)                                | 0.000 | 0.160 | 0.332 |
| Propionibacterium_acnes      | 0 (0,0)                               | 0.000 | 0 (0,0)                                | 0.000 | 0.160 | 0.332 |
| Rothia_dentocariosa          | 0 (0,0)                               | 0.000 | 0 (0,0)                                | 0.000 | 0.160 | 0.332 |
| Ruminococcus_albus           | 0 (0,0)                               | 0.000 | 0 (0,0)                                | 0.000 | 0.160 | 0.332 |
| Sphaerotilus_natans          | 0 (0,0)                               | 0.000 | 0 (0,0)                                | 0.000 | 0.160 | 0.332 |
| Sutterella_wadsworthensis    | 0 (0,0)                               | 0.000 | 0 (0,0)                                | 0.000 | 0.167 | 0.339 |
| Ruminococcus_faecis          | 0.00749<br>(0,0.022555)               | 0.023 | 0.0096415<br>(0.0039785,0.0            | 0.044 | 0.170 | 0.341 |

) 4815275)

|                                 |                                    |        |                                      |       |       |       |
|---------------------------------|------------------------------------|--------|--------------------------------------|-------|-------|-------|
| Cloacibacillus_ evryensis       | 0 (0,0)                            | 0.000  | 0 (0,0)                              | 0.000 | 0.180 | 0.358 |
| Fusobacteriu m_varium           | 0 (0,0)                            | 0.000  | 0 (0,0)                              | 0.000 | 0.184 | 0.362 |
| Coprococcus_ comes              | 0.090711<br>(0.008028,0.2138515)   | 0.206  | 0.0519835<br>(0.00534525,0.14250075) | 0.137 | 0.214 | 0.418 |
| Anaerofustis_ stercorihomini s  | 0 (0,0)                            | 0.000  | 0 (0,0)                              | 0.000 | 0.225 | 0.432 |
| Megasphaera_ elsdenii           | 0 (0,0)                            | 0.000  | 0 (0,0)                              | 0.000 | 0.225 | 0.432 |
| Acidaminococ cus_ fermenta ns   | 0 (0,0)                            | 0.000  | 0 (0,0)                              | 0.000 | 0.231 | 0.435 |
| Prevotella_ co pri              | 0.0100535<br>(0,18.21423375)       | 18.214 | 0.005152<br>(0,0.1351025)            | 0.135 | 0.232 | 0.435 |
| Turicibacter_ s anguinis        | 0 (0,0)                            | 0.000  | 0 (0,0.005164)                       | 0.005 | 0.231 | 0.435 |
| Abiotrophia_ d efectiva         | 0 (0,0)                            | 0.000  | 0 (0,0)                              | 0.000 | 0.259 | 0.447 |
| Anaerofilum_ pentosovorana s    | 0 (0,0)                            | 0.000  | 0 (0,0)                              | 0.000 | 0.328 | 0.447 |
| Bacillus_ coag ulans            | 0 (0,0)                            | 0.000  | 0 (0,0)                              | 0.000 | 0.328 | 0.447 |
| Bacillus_ ther moamylovora ns   | 0 (0,0)                            | 0.000  | 0 (0,0)                              | 0.000 | 0.328 | 0.447 |
| Bacteroides_ b arnesiae         | 0 (0,0)                            | 0.000  | 0 (0,0)                              | 0.000 | 0.328 | 0.447 |
| Bacteroides_ c oprophilus       | 0 (0,0)                            | 0.000  | 0 (0,0)                              | 0.000 | 0.327 | 0.447 |
| Bacteroides_ i ntestinalis      | 0 (0,0)                            | 0.000  | 0 (0,0)                              | 0.000 | 0.256 | 0.447 |
| Bacteroides_ massiliensis       | 0<br>(0,0.004328)                  | 0.004  | 0 (0,0)                              | 0.000 | 0.252 | 0.447 |
| Bacteroides_ s artorii          | 0 (0,0)                            | 0.000  | 0 (0,0)                              | 0.000 | 0.328 | 0.447 |
| Bacteroides_ s tercoris         | 0.3065525<br>(0.0138375, 2.110356) | 2.097  | 0.0904885<br>(0.008692,0.9058375)    | 0.897 | 0.273 | 0.447 |
| Bifidobacteriu m_ adolescenti s | 0 (0,0)                            | 0.000  | 0 (0,0)                              | 0.000 | 0.328 | 0.447 |

|                                |                             |       |                                |       |       |       |
|--------------------------------|-----------------------------|-------|--------------------------------|-------|-------|-------|
| Blautia_obeum                  | 0<br>(0,0.00459925)         | 0.005 | 0<br>(0,0.0056475)             | 0.006 | 0.285 | 0.447 |
| Campylobacter_hominis          | 0 (0,0)                     | 0.000 | 0 (0,0)                        | 0.000 | 0.320 | 0.447 |
| Campylobacter_jejuni           | 0 (0,0)                     | 0.000 | 0 (0,0)                        | 0.000 | 0.328 | 0.447 |
| Catenibacterium_mitsuokai      | 0 (0,0)                     | 0.000 | 0 (0,0)                        | 0.000 | 0.320 | 0.447 |
| Cellulosilyticum_ruminicola    | 0 (0,0)                     | 0.000 | 0 (0,0)                        | 0.000 | 0.328 | 0.447 |
| Chryseobacterium_hominis       | 0 (0,0)                     | 0.000 | 0 (0,0)                        | 0.000 | 0.328 | 0.447 |
| Cloacibacterium_normanense     | 0 (0,0)<br>0.0099195        | 0.000 | 0 (0,0)                        | 0.000 | 0.328 | 0.447 |
| Clostridium_bartlettii         | (0.00399525,0.05182775)     | 0.048 | 0.0181015<br>(0.0059,0.049472) | 0.044 | 0.281 | 0.447 |
| Clostridium_lactatifermentans  | 0.0048945<br>(0,0.01425525) | 0.014 | 0 (0,0.013063)                 | 0.013 | 0.282 | 0.447 |
| Clostridium_scindens           | 0<br>(0,0.004986)           | 0.005 | 0<br>(0,0.01291725)            | 0.013 | 0.302 | 0.447 |
| Daeguia_caeni                  | 0 (0,0)                     | 0.000 | 0 (0,0)                        | 0.000 | 0.328 | 0.447 |
| Eubacterium_callanderi         | 0 (0,0)                     | 0.000 | 0 (0,0)                        | 0.000 | 0.266 | 0.447 |
| Gemella_sanguinis              | 0<br>(0,0.0046605)          | 0.005 | 0<br>(0,0.0080245)             | 0.008 | 0.280 | 0.447 |
| Helicobacter_equorum           | 0 (0,0)                     | 0.000 | 0 (0,0)                        | 0.000 | 0.328 | 0.447 |
| Lactobacillus_paracasei        | 0 (0,0)                     | 0.000 | 0 (0,0)                        | 0.000 | 0.328 | 0.447 |
| Lactobacillus_ruminis          | 0 (0,0)                     | 0.000 | 0 (0,0)                        | 0.000 | 0.299 | 0.447 |
| Megamonas_rupellensis          | 0 (0,0)                     | 0.000 | 0 (0,0)                        | 0.000 | 0.328 | 0.447 |
| Methylobacterium_komagatae     | 0 (0,0)                     | 0.000 | 0 (0,0)                        | 0.000 | 0.328 | 0.447 |
| Negativicoccus_succinicivorans | 0 (0,0)                     | 0.000 | 0 (0,0)                        | 0.000 | 0.328 | 0.447 |
| Paraprevotella_xylaniphila     | 0 (0,0)                     | 0.000 | 0 (0,0)                        | 0.000 | 0.328 | 0.447 |



|                                       |                                              |       |                                        |       |       |       |
|---------------------------------------|----------------------------------------------|-------|----------------------------------------|-------|-------|-------|
| Phocaeicola_a<br>bscessus             | 0 (0,0)                                      | 0.000 | 0 (0,0)                                | 0.000 | 0.328 | 0.447 |
| Plesiomonas_<br>shigelloides          | 0 (0,0)                                      | 0.000 | 0 (0,0)                                | 0.000 | 0.328 | 0.447 |
| Pseudoxantho<br>monas_taiwa<br>nensis | 0 (0,0)                                      | 0.000 | 0 (0,0)                                | 0.000 | 0.328 | 0.447 |
| Ralstonia_insi<br>diosa               | 0 (0,0)                                      | 0.000 | 0 (0,0)                                | 0.000 | 0.328 | 0.447 |
| Ralstonia_pick<br>ettii               | 0 (0,0)                                      | 0.000 | 0 (0,0)                                | 0.000 | 0.328 | 0.447 |
| Raoultella_or<br>nithinolytica        | 0 (0,0)                                      | 0.000 | 0 (0,0)                                | 0.000 | 0.245 | 0.447 |
| Rheinheimera<br>_texasensis           | 0 (0,0)                                      | 0.000 | 0 (0,0)                                | 0.000 | 0.328 | 0.447 |
| Ruminococcus<br>_callidus             | 0<br>(0,0.098409<br>75)                      | 0.098 | 0.0104055<br>(0,0.13720775)            | 0.137 | 0.321 | 0.447 |
| Shinella_kum<br>merowiae              | 0 (0,0)                                      | 0.000 | 0 (0,0)                                | 0.000 | 0.299 | 0.447 |
| Sphingomona<br>s_yunnanensis          | 0 (0,0)                                      | 0.000 | 0 (0,0)                                | 0.000 | 0.328 | 0.447 |
| Tepidimonas_<br>fonticaldi            | 0 (0,0)                                      | 0.000 | 0 (0,0)                                | 0.000 | 0.328 | 0.447 |
| Thermicanus_<br>aegyptius             | 0 (0,0)                                      | 0.000 | 0 (0,0)                                | 0.000 | 0.328 | 0.447 |
| Truepera_radi<br>ovictrix             | 0 (0,0)                                      | 0.000 | 0 (0,0)                                | 0.000 | 0.328 | 0.447 |
| Uruburuella_s<br>uis                  | 0 (0,0)                                      | 0.000 | 0 (0,0)                                | 0.000 | 0.328 | 0.447 |
| Klebsiella_pne<br>umoniae             | 0<br>(0,0.005226<br>75)                      | 0.005 | 0.0018175<br>(0,0.01463575)            | 0.015 | 0.333 | 0.448 |
| Parasutterella<br>_secunda            | 0 (0,0)                                      | 0.000 | 0 (0,0)                                | 0.000 | 0.331 | 0.448 |
| Sutterella_ste<br>rcoicanis           | 0 (0,0)                                      | 0.000 | 0 (0,0)                                | 0.000 | 0.335 | 0.449 |
| Eubacterium_<br>coprostanolig<br>enes | 0.047684<br>(0.004136,0.<br>5270615)         | 0.523 | 0.0377615<br>(0,0.2299035)             | 0.230 | 0.342 | 0.456 |
| Butyricococcus<br>_pullicaecoru<br>m  | 0.0233335<br>(0.00462775<br>,0.10223775<br>) | 0.098 | 0.0343085<br>(0.013933,0.09<br>428925) | 0.080 | 0.353 | 0.468 |
| Clostridium_vi<br>ride                | 0<br>(0,0.004319<br>)                        | 0.004 | 0<br>(0,0.0085825)                     | 0.009 | 0.355 | 0.468 |

|                               |                                              |       |                                         |       |       |       |
|-------------------------------|----------------------------------------------|-------|-----------------------------------------|-------|-------|-------|
| Actinomyces_<br>graevenitzii  | 0 (0,0)                                      | 0.000 | 0 (0,0)                                 | 0.000 | 0.396 | 0.512 |
| Paraprevotella<br>_clara      | 0 (0,0)                                      | 0.000 | 0 (0,0)                                 | 0.000 | 0.392 | 0.512 |
| Ruminococcus<br>_bromii       | 0.4668695<br>(0.08067775<br>,1.68742625<br>) | 1.607 | 0.283268<br>(0.01821225,1.<br>41034675) | 1.392 | 0.396 | 0.512 |
| Alistipes_ond<br>erdonkii     | 0.050782<br>(0.005135,0.<br>26589925)        | 0.261 | 0.0318795<br>(0,0.4652535)              | 0.465 | 0.406 | 0.520 |
| Slackia_pirifor<br>mis        | 0 (0,0)                                      | 0.000 | 0 (0,0)                                 | 0.000 | 0.406 | 0.520 |
| Bacteroides_fi<br>negoldii    | 0 (0,0)                                      | 0.000 | 0 (0,0)                                 | 0.000 | 0.417 | 0.527 |
| Granulicatella<br>_elegans    | 0 (0,0)                                      | 0.000 | 0 (0,0)                                 | 0.000 | 0.417 | 0.527 |
| Clostridium_a<br>sparagiforme | 0 (0,0)                                      | 0.000 | 0 (0,0)                                 | 0.000 | 0.443 | 0.557 |
| Dialister_pneu<br>mosintes    | 0 (0,0)                                      | 0.000 | 0 (0,0)                                 | 0.000 | 0.453 | 0.566 |
| Parabacteroid<br>es_merdae    | 0.1401575<br>(0.005724,0.<br>55318125)       | 0.547 | 0.117282<br>(0,0.39638)                 | 0.396 | 0.459 | 0.570 |
| Coprococcus_<br>catus         | 0<br>(0,0.012423<br>5)                       | 0.012 | 0<br>(0,0.0148015)                      | 0.015 | 0.463 | 0.573 |
| Bacteroides_s<br>alyersiae    | 0<br>(0,0.020134<br>25)                      | 0.020 | 0.0042725<br>(0,0.012037)               | 0.012 | 0.466 | 0.573 |
| Sarcina_ventri<br>culi        | 0 (0,0)                                      | 0.000 | 0 (0,0)                                 | 0.000 | 0.482 | 0.589 |
| Roseburia_inu<br>linivorans   | 0.208197<br>(0.05144575<br>,0.938633)        | 0.887 | 0.1366435<br>(0.018166,1.00<br>91595)   | 0.991 | 0.489 | 0.594 |
| Desulfovibrio_<br>piger       | 0 (0,0)                                      | 0.000 | 0 (0,0)                                 | 0.000 | 0.505 | 0.610 |
| Alistipes_indis<br>tinctus    | 0.001961<br>(0,0.059245<br>25)               | 0.059 | 0 (0,0.032919)                          | 0.033 | 0.533 | 0.642 |
| Lactobacillus_<br>oris        | 0 (0,0)                                      | 0.000 | 0 (0,0)                                 | 0.000 | 0.551 | 0.656 |
| Roseburia_fae<br>cis          | 0 (0,0)                                      | 0.000 | 0 (0,0)                                 | 0.000 | 0.549 | 0.656 |
| Clostridium_ci<br>troniae     | 0 (0,0)                                      | 0.000 | 0 (0,0)                                 | 0.000 | 0.568 | 0.659 |
| Kocuria_palus<br>tris         | 0 (0,0)                                      | 0.000 | 0 (0,0)                                 | 0.000 | 0.568 | 0.659 |

|                                    |                                            |       |                                          |       |       |       |
|------------------------------------|--------------------------------------------|-------|------------------------------------------|-------|-------|-------|
| Odoribacter_l<br>aneus             | 0 (0,0)                                    | 0.000 | 0 (0,0)                                  | 0.000 | 0.568 | 0.659 |
| Parabacteroid<br>es_gordonii       | 0 (0,0)                                    | 0.000 | 0 (0,0)                                  | 0.000 | 0.568 | 0.659 |
| Prevotella_ti<br>monensis          | 0 (0,0)                                    | 0.000 | 0 (0,0)                                  | 0.000 | 0.568 | 0.659 |
| Bacteroides_x<br>ylanisolvens      | 0.16902025<br>,3.12830475<br>)<br>0.094937 | 2.959 | 0.9058265<br>(0.1975215,2.3<br>0964025)  | 2.112 | 0.578 | 0.667 |
| Oscillibacter_v<br>alericigenes    | (0.02261125<br>,0.18905375<br>)            | 0.166 | 0.078005<br>(0.0135505,0.2<br>85895)     | 0.272 | 0.587 | 0.671 |
| Ruminococcus<br>_flavefaciens      | 0 (0,0)                                    | 0.000 | 0 (0,0)                                  | 0.000 | 0.585 | 0.671 |
| Escherichia_fe<br>rgusonii         | 0.070175<br>(0.013279,0.<br>2873375)       | 0.274 | 0.12032<br>(0,0.27019575)                | 0.270 | 0.605 | 0.687 |
| Victivallis_vad<br>ensis           | 0 (0,0)                                    | 0.000 | 0 (0,0)                                  | 0.000 | 0.612 | 0.692 |
| Alistipes_shah<br>ii               | 0.015845<br>(0,0.202260<br>75)             | 0.202 | 0.007859<br>(0,0.257981)                 | 0.258 | 0.656 | 0.738 |
| Bacteroides_r<br>odentium          | 0 (0,0)                                    | 0.000 | 0 (0,0)                                  | 0.000 | 0.669 | 0.749 |
| Prevotella_dis<br>iens             | 0 (0,0)                                    | 0.000 | 0 (0,0)                                  | 0.000 | 0.684 | 0.762 |
| Flavonifractor<br>_plautii         | 0.035952<br>(0.00894275<br>,0.1055155)     | 0.097 | 0.0347135<br>(0.0065955,0.0<br>80181)    | 0.074 | 0.687 | 0.762 |
| Bacteroides_c<br>ellulosilyticus   | 0.004209<br>(0,0.041267<br>25)             | 0.041 | 0<br>(0,0.03470675)                      | 0.035 | 0.712 | 0.785 |
| Lactobacillus_<br>salivarius       | 0 (0,0)                                    | 0.000 | 0 (0,0)                                  | 0.000 | 0.715 | 0.785 |
| Pyramidobact<br>er_piscolens       | 0 (0,0)                                    | 0.000 | 0 (0,0)                                  | 0.000 | 0.756 | 0.826 |
| Bacteroides_c<br>oprocola          | 0<br>(0,0.022167<br>)                      | 0.022 | 0<br>(0,0.07804625)                      | 0.078 | 0.778 | 0.846 |
| Barnesiella_in<br>testinihominis   | 0<br>(0,0.106835<br>5)                     | 0.107 | 0<br>(0,0.06300675)                      | 0.063 | 0.820 | 0.885 |
| Butyricimonas<br>_virosa           | 0<br>(0,0.018616<br>75)                    | 0.019 | 0<br>(0,0.0107795)                       | 0.011 | 0.822 | 0.885 |
| Haemophilus_<br>parainfluenza<br>e | 0.0265145<br>(0,0.154730<br>25)            | 0.155 | 0.0250525<br>(0.00491975,0.<br>13211375) | 0.127 | 0.839 | 0.898 |

|                                         |                                       |       |                                          |       |       |       |
|-----------------------------------------|---------------------------------------|-------|------------------------------------------|-------|-------|-------|
| Acinetobacter<br>_beijerinckii          | 0 (0,0)                               | 0.000 | 0 (0,0)                                  | 0.000 | 1.000 | 1.000 |
| Bacteroides_cl<br>arus                  | 0 (0,0)                               | 0.000 | 0 (0,0)                                  | 0.000 | 0.974 | 1.000 |
| Bacteroides_e<br>ggerthii               | 0 (0,0)                               | 0.000 | 0 (0,0)                                  | 0.000 | 0.987 | 1.000 |
| Bacteroides_u<br>niformis               | 0.922804<br>(0.08522875<br>,3.575247) | 3.490 | 0.8454785<br>(0.10672025,3.<br>57849425) | 3.472 | 0.941 | 1.000 |
| Clostridium_m<br>ethylpentosu<br>m      | 0 (0,0)                               | 0.000 | 0 (0,0)                                  | 0.000 | 1.000 | 1.000 |
| Collinsella_tan<br>akaei                | 0 (0,0)                               | 0.000 | 0 (0,0)                                  | 0.000 | 1.000 | 1.000 |
| Eggerthella_le<br>nta                   | 0<br>(0,0.00506)                      | 0.005 | 0<br>(0,0.00606725)                      | 0.006 | 0.958 | 1.000 |
| Finegoldia_ma<br>gna                    | 0 (0,0)                               | 0.000 | 0 (0,0)                                  | 0.000 | 1.000 | 1.000 |
| Lactobacillus_<br>sanfranciscens<br>is  | 0 (0,0)                               | 0.000 | 0 (0,0)                                  | 0.000 | 1.000 | 1.000 |
| Peptococcus_<br>niger                   | 0 (0,0)                               | 0.000 | 0 (0,0)                                  | 0.000 | 1.000 | 1.000 |
| Peptoniphilus<br>_lacrimalis            | 0 (0,0)                               | 0.000 | 0 (0,0)                                  | 0.000 | 1.000 | 1.000 |
| Porphyromon<br>as_bennonis              | 0 (0,0)                               | 0.000 | 0 (0,0)                                  | 0.000 | 0.974 | 1.000 |
| Pseudoflavoni<br>fractor_capillo<br>sus | 0 (0,0)                               | 0.000 | 0 (0,0)                                  | 0.000 | 1.000 | 1.000 |
| Veillonella_ro<br>gosae                 | 0 (0,0)                               | 0.000 | 0 (0,0)                                  | 0.000 | 1.000 | 1.000 |
